## Transient Diabetes Associated With Withdrawal of Lithium Therapy

We describe a patient with bipolar disease who developed diabetic ketoacidosis following discontinuation of long-term lithium treatment. Diabetes resolved completely after 7 months of insulin therapy. Transient diabetes in this patient could have been precipitated by withdrawal of lithium therapy.

A 26-year-old white male was admitted to our hospital with vomiting and abdominal pain. He suffered from bipolar disorder and had been on lithium treatment for 3 years. Six weeks before presentation, he had discontinued lithium due to persistent tremors and 2 weeks afterward developed excessive thirst and polyuria. He had no personal or family history of diabetes and was not receiving any other medications. On arrival, his BMI was 24 kg/m<sup>2</sup> and he was dehydrated and acidotic (pH 7.11), with ketonuria and hyperglycemia (blood glucose 33 mmol/l). We diagnosed diabetic ketoacidosis and treated him accordingly with intravenous fluids and soluble insulin. He rapidly improved and was discharged on twice-daily biphasic insulin. HbA<sub>1c</sub> (A1C) was 7.2% 1 month later. Subsequently, he experienced repeated hypoglycemic spells, which led to cessation of insulin after 7 months. At this stage, A1C was 5.4% and oral glucose tolerance test was normal, with adequate insulin and C-peptide responses to a glucose load. GAD and islet cell antibodies were negative. After 3 years off treatment, his A1C has remained <5.5%.

We considered several explanations for the unusual profile of diabetes in this patient. The initial presentation was suggestive of type 1 diabetes, but the remitting course makes this diagnosis unlikely. Although prolonged remission may occur in early type 1 diabetes, this honeymoon period is unlikely to last 3 years. Atypical type 2 diabetes, characterized by ketosis at onset and subsequent remission, has been described in African patients but not in whites (1). Nonetheless, the negative antibodies and subsequent insulin independence in this case favor type 2 diabetes as the more likely diagnosis.

The onset of diabetes followed dis-

continuation of lithium, thus suggesting that lithium withdrawal precipitated diabetes. The effects of lithium on carbohydrate metabolism are complex, and improvement and worsening of glucose tolerance have both been observed in patients receiving lithium (2,3). Studies in rats show that lithium exerts antidiabetic effects by increasing glycogenesis, either through an insulin-sensitizing action or through direct activation of enzymes involved in hepatic glycogenesis (3). An intriguing possibility in this case, therefore, is that diabetes was masked by lithium treatment and precipitated by its withdrawal. To the best of our knowledge, this is the first report of diabetes occurring in association with lithium withdrawal. Clinicians should be vigilant to similar cases that may provide insights into atypical presentations of diabetes.

ONYEBUCHI E. OKOSIEME, MRCP  
ANDREW CAMPBELL, MBBCH  
KATIE PATTON, MBBCH  
MARC L. EVANS, MD, MRCP

From the Centre for Endocrine and Diabetes Science, School of Medicine, Cardiff University, Cardiff, U.K.

Address correspondence to Dr. Onyebuchi E. Okosieme, Centre for Endocrine and Diabetes Science, School of Medicine, Cardiff University, Cardiff, U.K. E-mail: okosiemeoe@cf.ac.uk.

DOI: 10.2337/dc06-0291

© 2006 by the American Diabetes Association.

### References

1. Sobngwi E, Mauvais-Jarvis F, Vexiau P, Mbanya JC, Gautier JF: Diabetes in Africans. Part 2: ketosis-prone atypical diabetes mellitus. *Diabetes Metab* 28:5–12, 2002
2. Saran AS: Antidiabetic effects of lithium. *J Clin Psychiatry* 43:383–384, 1982
3. Rodriguez-Gil JE, Fernandez-Novell JM, Barbera A, Guinovart JJ: Lithium's effects on rat liver glucose metabolism in vivo. *Arch Biochem Biophys* 375:377–384, 2000

## Association of hGrb10 Genetic Variations With Type 2 Diabetes in Caucasian Subjects

The genes contributing to type 2 diabetes are mostly unknown (1). Grb10 is an adapter protein that, in target tissues (2,3), interacts with the in-

sulin receptor (3–9), thus affecting downstream signaling (10–12) and insulin action (2,7,10–16). We tested the hypothesis that variants in the Grb10 gene modulate the risk for type 2 diabetes, one of the most frequent outcomes of insulin resistance.

Resequencing of coding and immediately flanking sequences of hGrb10 (17,18) identified six single nucleotide polymorphisms (SNPs), five of which had a minor allele frequency >5%. Based on their physical location and their mutual linkage disequilibrium, these five SNPs (i.e., rs1800504, rs2715128, rs2072235, rs4947710, and rs3807550) could be grouped into two clusters. The rs1800504 and rs4947710 SNPs (each belonging to different clusters) were analyzed for association with type 2 diabetes in 764 diabetic patients and 323 unrelated control subjects from the east coast of central Italy (19,20). No significant association with type 2 diabetes was observed for rs1800504 (data not shown). By contrast, the genotype distributions of rs4947710 (i.e., G/G, G/A, and A/A) were significantly different between case and control subjects (87.2, 12.3, and 0.5% vs. 61.9, 35.8, and 2.3%, respectively,  $P < 0.0001$ ), with A allele carriers showing a reduced risk of type 2 diabetes (unadjusted odds ratio 0.239 [95% CI 0.17–0.33],  $P = 0.0001$ ; age-, sex-, and BMI-adjusted odds ratio 0.235 [95% CI 0.15–0.36],  $P = 0.0001$ ). A potential biological relevance of rs4947710 was suggested by an in silico analysis (ESEfinder; available at <http://exon.cshl.edu/ESE/>), which indicated that the G-to-A substitution of rs4947710 may cause the disruption of a putative consensus motif for the human Ser/Arg-rich proteins SF2/ASF.

To replicate this association, we studied 731 type 2 diabetic case and 358 nondiabetic control subjects, all being Caucasians from the Boston area (20). In contrast to what was observed in the Italian population, the genotype distributions of rs4947710 were similar in case and control subjects (G/G = 83.9%, G/A = 15.2%, and A/A = 1.0% and G/G = 86.0%, G/A = 14.0%, and A/A = 0.0%, respectively,  $P = 0.15$ ).

In conclusion, a significant association between the hGrb10 rs4947710 SNP (whose biological function on differential splicing is suggested by in silico analysis) and type 2 diabetes was found in Caucasian subjects from Italy but not in those from the U.S. Lack of replication of genotype-phenotype associations is not an

uncommon event in the study of complex disorders (21–23) and can arise from the original result being a false-positive because of bias or chance or from the second result being a false negative because of insufficient power. Such explanations, however, do not seem to account for our conflicting findings. The population of the original study was relatively homogeneous, making the possibility of population stratification remote, and the *P* value for association with type 2 diabetes was highly significant, making chance an unlikely explanation of the association finding. The replication study had close to 100% power to detect the odds ratio observed in the original study. Thus, lack of replication in our study is likely to result from differences in the genetic and/or environmental background of the populations studied, highlighting the need for large, collaborative studies providing sufficient power to investigate gene-gene and gene-environment interactions and their differences among populations.

ROSA DI PAOLA, PHD<sup>1</sup>  
ESTER CIOCIOLA, PHD<sup>1</sup>  
WATIP BOONYASIRISAWAT, MS<sup>2</sup>  
DAVID NOLAN, BS<sup>2</sup>  
JILL DUFFY, BS<sup>2</sup>  
GIUSEPPE MISCIO, PHD<sup>1</sup>  
CARMELA CISTERNINO, BSC<sup>1</sup>  
GRAZIA FINI, BSC<sup>1</sup>  
VITTORIO TASSI, MD, PHD<sup>1</sup>  
ALESSANDRO DORIA, MD, PHD<sup>2</sup>  
VINCENZO TRISCHITTA, MD<sup>1,3</sup>

From the <sup>1</sup>Research Unit of Endocrinology, Scientific Institute "Casa Sollievo della Sofferenza," San Giovanni Rotondo, Italy; the <sup>2</sup>Research Division, Department of Medicine, Joslin Diabetes Center, Harvard Medical School, Boston, Massachusetts; and the <sup>3</sup>Department of Clinical Sciences, University "La Sapienza," Rome, Italy.

Address correspondence to Rosa Di Paola, Research Unit of Endocrinology, Scientific Institute "Casa Sollievo della Sofferenza," Viale Padre Pio, 71013 San Giovanni Rotondo, Italy. E-mail: r.dipaola@operapadrepio.it; or Vincenzo Trischitta, Department of Clinical Sciences, University "La Sapienza," Policlinico Umberto I, 00161, Rome, Italy. E-mail: vincenzo.trischitta@uniroma1.it.

DOI: 10.2337/dc06-2551

© 2006 by the American Diabetes Association.

**Acknowledgments**—This Research was supported by Telethon Grant GGP02423, by Italian Ministry of Health Grant Ricerca Corrente 2005, and National Institutes of Health Grants DK60837 (Diabetes Genome Anatomy Project) and DK36836 (Genetics Core of the Diabetes and Endocrinology Research Center at the Joslin Diabetes Center).

## References

- Almind K, Doria A, Kahn CR: Putting the genes for type II diabetes on the map. *Nat Med* 7:277–279, 2001
- Morrione A, Valentinis B, Resnicoff M, Xu S, Baserga R: The role of mGrb10alpha in insulin-like growth factor I-mediated growth. *J Biol Chem* 272:26382–26387, 1997
- Dey BR, Frick K, Lopaczynski W, Nissley SP, Furlanetto RW: Evidence for the direct interaction of the insulin-like growth factor I receptor with IRS-1, Shc, and Grb10. *Mol Endocrinol* 10:631–641, 1996
- Hansen H, Svensson U, Zhu J, Laviola L, Giorgino F, Wolf G, Smith RJ, Riedel H: Interaction between the Grb10 SH2 domain and the insulin receptor carboxyl terminus. *J Biol Chem* 271:8882–8886, 1996
- Laviola L, Giorgino F, Chow JC, Baquero JA, Hansen H, Ooi J, Zhu J, Riedel H, Smith RJ: The adapter protein Grb10 associates preferentially with the insulin receptor as compared with the IGF-I receptor in mouse fibroblasts. *J Clin Invest* 99:830–837, 1997
- Morrione A, Valentinis B, Li S, Ooi JY, Margolis B, Baserga R: Grb10: a new substrate of the insulin-like growth factor I receptor. *Cancer Res* 56:3165–3167, 1996
- O'Neill TJ, Rose DW, Pillay TS, Hotta K, Olefsky JM, Gustafson TA: Interaction of a GRB-IR splice variant (a human GRB10 homolog) with the insulin and insulin-like growth factor I receptors: evidence for a role in mitogenic signaling. *J Biol Chem* 271:22506–22513, 1996
- Dong LQ, Farris S, Christal J, Liu F: Site-directed mutagenesis and yeast two-hybrid studies of the insulin and insulin-like growth factor-1 receptors: the Src homology-2 domain-containing protein hGrb10 binds to the autophosphorylated tyrosine residues in the kinase domain of the insulin receptor. *Mol Endocrinol* 11:1757–1765, 1997
- Frantz JD, Giorgetti-Peraldi S, Ottinger EA, Shoelson SE: Human GRB-IRbeta/GRB10: splice variants of an insulin and growth factor receptor-binding protein with PH and SH2 domains. *J Biol Chem* 272:2659–2667, 1997
- Liu F, Roth RA: Grb-IR: a SH2-domain-containing protein that binds to the insulin receptor and inhibits its function. *Proc Natl Acad Sci U S A* 92:10287–10291, 1995
- Wick KR, Werner ED, Langlais P, Ramos FJ, Dong LQ, Shoelson SE, Liu F: Grb10 inhibits insulin-stimulated insulin receptor substrate (IRS)-phosphatidylinositol 3-kinase/Akt signaling pathway by disrupting the association of IRS-1/IRS-2 with the insulin receptor. *J Biol Chem* 278:8460–8467, 2003
- Morrione A: Grb10 proteins in insulin-like growth factor and insulin receptor signaling (Review). *Int J Mol Med* 5:151–154, 2000
- Morrione A: Grb10 adapter protein as regulator of insulin-like growth factor receptor signaling. *J Cell Physiol* 197:307–311, 2003
- Wang J, Dai H, Yousaf N, Moussaif M, Deng Y, Boufelliga A, Swamy OR, Leone ME, Riedel H: Grb10, a positive, stimulatory signaling adapter in platelet-derived growth factor BB-, insulin-like growth factor I-, and insulin-mediated mitogenesis. *Mol Cell Biol* 19:6217–6228, 1999
- Mounier C, Lavoie L, Dumas V, Mohammad-Ali K, Wu J, Nantel A, Bergeron JJ, Thomas DY, Posner BI: Specific inhibition by hGRB10zeta of insulin-induced glycogen synthase activation: evidence for a novel signaling pathway. *Mol Cell Endocrinol* 173:15–27, 2001
- Deng Y, Bhattacharya S, Swamy OR, Tandon R, Wang Y, Janda R, Riedel H: Growth factor receptor-binding protein 10 (Grb10) as a partner of phosphatidylinositol 3-kinase in metabolic insulin action. *J Biol Chem* 278:39311–39322, 2003
- Angrist M, Bolk S, Bentley K, Nallasamy S, Halushka MK, Chakravarti A: Genomic structure of the gene for the SH2 and pleckstrin homology domain-containing protein GRB10 and evaluation of its role in Hirschsprung disease. *Oncogene* 17:3065–3070, 1998
- Blagitko N, Mergenthaler S, Schulz U, Wollmann HA, Craigen W, Eggermann T, Ropers HH, Kalscheuer VM: Human GRB10 is imprinted and expressed from the paternal and maternal allele in a highly tissue- and isoform-specific fashion. *Hum Mol Genet* 9:1587–1595, 2000
- Di Paola R, Frittitta L, Miscio G, Bozzali M, Baratta R, Centra M, Spampinato D, Santagati MG, Ercolino T, Cisternino C, Soccio T, Mastroianno S, Tassi V, Almgren P, Pizzuti A, Vigneri R, Trischitta V: A variation in 3' UTR of hPTP1B increases specific gene expression and associates with insulin resistance. *Am J Hum Genet* 70:806–812, 2002
- Bacci S, Ludovico O, Prudente S, Zhang YY, Di Paola R, Mangiacotti D, Rauseo A, Nolan D, Duffy J, Fini G, Salvemini L, Amico C, Vigna C, Pellegrini F, Menzaghi C, Doria A, Trischitta V: The K121Q polymorphism of the ENPP1/PC-1 gene is associated with insulin resistance/atherogenic phenotypes, including earlier onset of type 2 diabetes and myocardial infarction. *Diabetes* 54:3021–3025, 2005
- Ioannidis JP, Ntzani EE, Trikalinos TA, Contopoulos-Ioannidis DG: Replication validity of genetic association studies. *Nat Genet* 29:306–309, 2001
- He W, Rose DW, Olefsky JM, Gustafson TA: Grb10 interacts differentially with the insulin receptor, insulin-like growth factor I receptor, and epidermal growth factor

tor receptor via the Grb10 Src homology 2 (SH2) domain and a second novel domain located between the pleckstrin homology and SH2 domains. *J Biol Chem* 273:6860–6867, 1998

23. Redden DT, Allison DB: Nonreplication in genetic association studies of obesity and diabetes research. *J Nutr* 133:3323–3326, 2003

## Metformin-Induced Pancreatitis

A possible adverse drug effect during acute renal failure

About 2% of episodes of acute pancreatitis are caused by drugs (1). Phenformin was repeatedly associated with acute pancreatitis (1), but only two case reports highlighted a possible causative role for metformin (2,3). In one case, acute pancreatitis occurred for the coexistence of correct metformin treatment and acute renal failure (2); in the other, metformin overdose was deemed responsible (3).

A 61-year-old woman with diabetes and hypercholesterolemia presented after 5 days of vomiting, followed by oliguria and epigastric pain. At home, the therapy of 3 g/day metformin and 80 mg/day fluvastatin was continued, despite symptoms. Laboratory investigations showed metabolic acidosis with normal lactate, creatinine 13 mg/dl, amylase 270 units/l (normal range 30–110), lipase 1,813 units/l (23–300), and white blood cells 9,000/mm<sup>3</sup> (80% neutrophils). Acute pancreatitis was confirmed by computed tomography. No recognized cause of acute pancreatitis was identified (hypertriglyceridemia, hypercalcemia, alcoholism, gall stones, virus, or trauma). Drugs were suspended, and a treatment of insulin and intravenous fluids normalized amylase, lipase, and blood gases. The patient was discharged with stable creatinine levels of 2.7 mg/dl. She was reexposed to fluvastatin for 1 month, but no symptoms were reported.

Available evidence suggests that acute pancreatitis was caused by metformin accumulation, resulting from a combination of drug overdose and acute renal failure, in turn triggered by vomiting in a patient with concealed renal insufficiency. Because renal failure is a contraindication to metformin, rechallenge was performed only for fluvastatin (1), with negative re-

sults. In this case, the association drug/effect is considered “probable” (4).

In the presence of appropriate doses and normal renal function, metformin-induced acute pancreatitis was never reported. However, when glomerular filtration rate (GFR) is <60 ml/min, metformin accumulates and adverse effects, mainly lactic acidosis, may occur (5,2). Our and previous observations (2,3) suggest to include acute pancreatitis among the possible metformin-induced adverse events precipitated by renal failure.

A GFR <60 ml/min with normal serum creatinine (concealed renal failure) increases the risk of adverse reactions from hydrosoluble drugs in elderly diabetic patients (6). We reanalyzed the data of hospitalized elderly from the Gruppo Italiano di Farmacovigilanza nell’Anziano study (1993–1998). Of 145 diabetic patients given metformin, 28 subjects had concealed renal failure (mean daily dose 808 ± 303 mg), while the other 28 patients had both reduced GFR and increased creatinine values (mean daily dose 686 ± 470 mg). These patients are at risk of acute renal failure, with critical metformin accumulation and ensuing toxicity, including acute pancreatitis.

Metformin is a precious antidiabetic drug (5). Nonetheless, acute pancreatitis can arise in patients with renal insufficiency. GFR should be carefully monitored in older diabetic patients taking metformin.

FILIPPO LUCA FIMOgnARI, MD<sup>1,2</sup>

ANDREA CORSONELLO, MD<sup>3</sup>

RUGGERO PASTORELLI, MD<sup>1</sup>

RAFFAELE ANTONELLI-INCALZI, MD<sup>2</sup>

From the <sup>1</sup>Division of Internal Medicine, Leopoldo Parodi-Delfino Hospital, ALS Roma G, Colleferro, Rome, Italy; the <sup>2</sup>Division of Geriatrics, University Campus Biomedico of Rome, Rome, Italy; and the <sup>3</sup>Division of Geriatrics, Istituto Nazionale Ricovero e Cura dell’Anziano, Istituto di Ricovero e Cura a Carattere Scientifico, Cosenza, Italy.

Address correspondence to Dr. Filippo L. Fimognari, Centro per la Salute dell’Anziano, University Campus Biomedico of Rome, Via dei Compositori 130, 00128, Rome, Italy. E-mail: filippo.fimognari@virgilio.it.

DOI: 10.2337/dc06-0338

© 2006 by the American Diabetes Association.

### References

1. Trivedi CD, Pitchumoni CS: Drug-induced pancreatitis: an update. *J Clin Gastroenterol* 39:709–716, 2005
2. Mallick S: Metformin induced acute pancreatitis precipitated by renal failure. *Postgrad Med J* 80:239–240, 2004
3. Ben MH, Thabet H, Zaghoudi I, Amamou M: Metformin associated acute pancreatitis. *Vet Hum Toxicol* 44:47–48, 2002
4. Edwards IR, Aronson JK: Adverse drug reactions: definitions, diagnosis, and management. *Lancet* 356:1255–1259, 2000
5. Inzucchi SE: Metformin and heart failure. *Diabetes Care* 28:2585–2587, 2005
6. Corsonello A, Pedone C, Corica F, Mazzei B, Di Iorio A, Carbonin P, Antonelli Incalzi R: Concealed renal failure and adverse drug reactions in older patients with type 2 diabetes mellitus. *J Gerontol A Biol Sci Med Sci* 60:1147–1151, 2005

## COMMENTS AND RESPONSES

### Change in HbA<sub>1c</sub> as a Measure of Quality of Diabetes Care

The Diabetes Quality Improvement Project established performance indicators that were adopted by The National Committee for Quality Assurance in the Diabetes Physician Recognition Program (DPRP) (1,2). The HbA<sub>1c</sub> (A1C) factors heavily in the scoring system, accounting for 15 of a possible 80 points. To achieve full credit, <20% of a random sampling of patients may have an A1C >9.0% and at least 40% must be <7.0%. This methodology may bias against diabetes consultants who are referred patients in worse control. Improvements in A1C may more readily reflect quality of care. The American Diabetes Association recommends an A1C of <7.0% (3) and in previous guidelines set ≥8.0% as a level whereupon “additional action is suggested” (4). The Diabetes Control and Complications Trial (DCCT) demonstrated that a decline in the A1C of 1% reduced microvascular complications by 30% or more (5). Therefore, poor control and clinically meaningful improvements may be defined by an A1C of ≥8% and –1%, respectively. The purpose of the present study is to evaluate change in A1C as a marker of quality of care.

Patients from one physician were evaluated, and all were referred from other providers. A1C data were collected prospectively in new patients from 1 January 2003 through 31 December 2004.
